# Supplementary material for: Exsolved LaNiRuO3 perovskite-based catalysts for CO2 methanation reaction
Source: Royal Society of Chemistry journal article supplement (doi:10.1039/d4su00410h), 2024-01-01
Supplement: d4su00410h1.pdf [file d4su00410h1.pdf]

**Exsolved LaNiRuO<sub>3</sub> perovskite-based catalysts for CO<sub>2</sub> methanation reaction**

Ayesha A. Alkhoori,<sup>1,2</sup> Eswaravara Prasadarao Komarala,<sup>1,2</sup> Aasif A. Dabbawala,<sup>1,2</sup> Aseel G.S. Hussien,<sup>1,2</sup> Dalaver H. Anjum,<sup>2,3</sup> Samuel Mao<sup>1</sup>, Kyriaki Polychronopoulou<sup>1,2\*</sup>

<sup>1</sup> Department of Mechanical and Nuclear Engineering, Khalifa University of Science and Technology, Main Campus, P. O. Box 127788, Abu Dhabi, United Arab Emirates.

<sup>2</sup> Center for Catalysis and Separations (CeCaS), Khalifa University of Science and Technology, P. O. Box 127788, Abu Dhabi, United Arab Emirates.

<sup>3</sup> Department of Physics, Khalifa University of Science and Technology, P. O. Box 127788, Abu Dhabi, United Arab Emirates.

\*Corresponding author e-mail: [kyriaki.polychrono@ku.ac.ae](mailto:kyriaki.polychrono@ku.ac.ae)

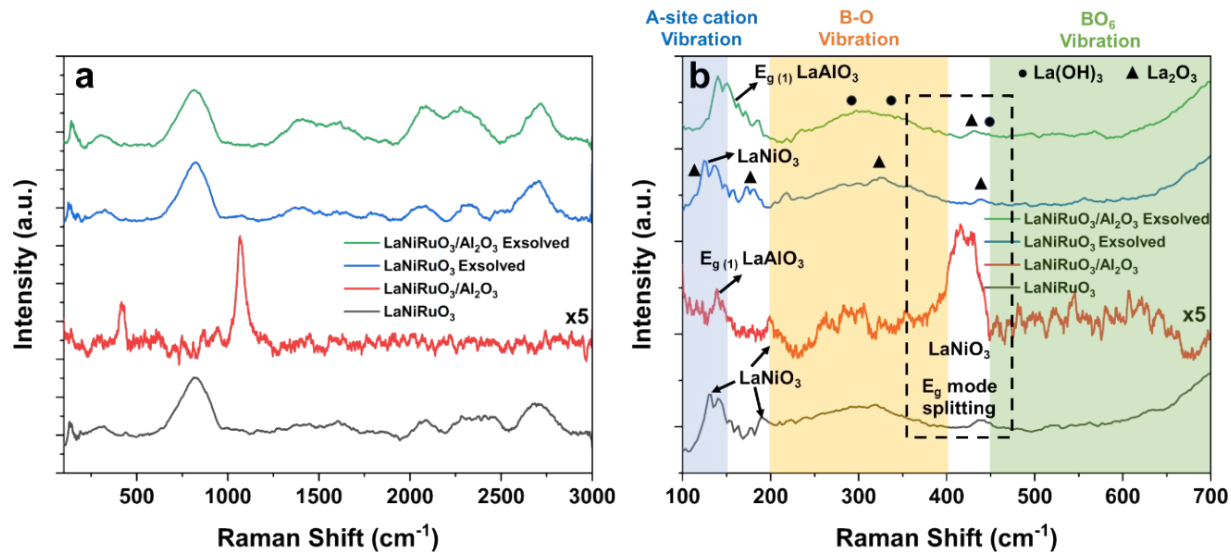

**Figure S1.** Raman Spectra of calcined and exsolved LaNiRuO<sub>3</sub> and LaNiRuO<sub>3</sub>/Al<sub>2</sub>O<sub>3</sub> catalysts (a) 100-3000 cm<sup>-1</sup> and (b) 100-700 cm<sup>-1</sup>.

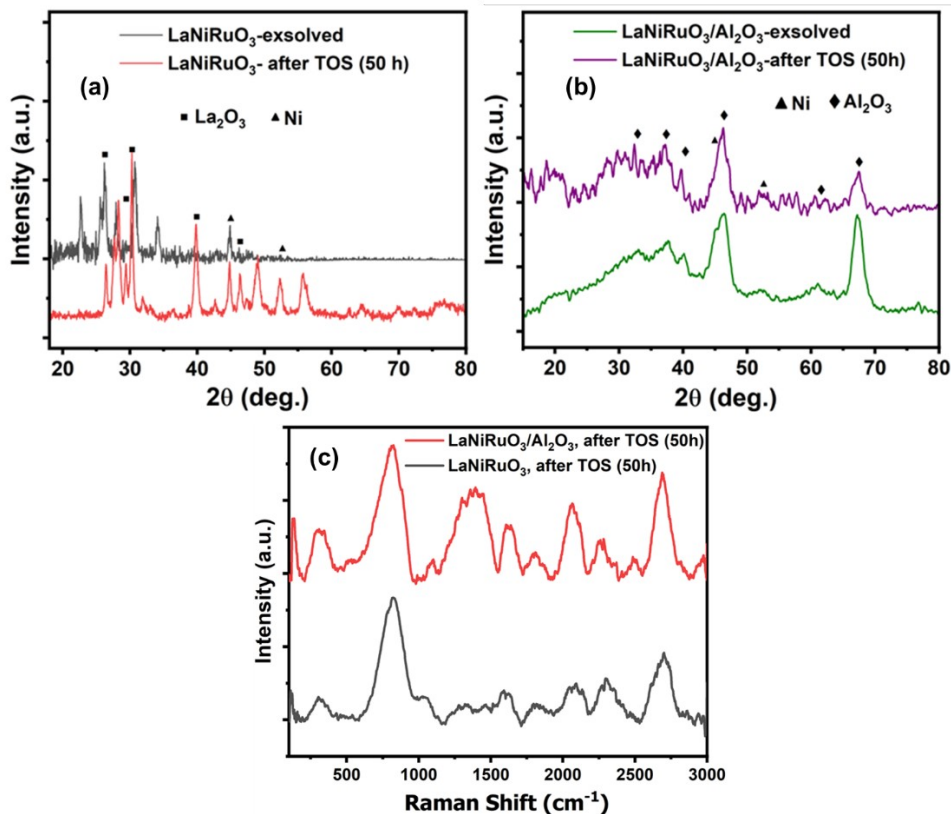

**Figure S2.** XRD diffractograms of (a) LaNiRuO<sub>3</sub> and (b) LaNiRuO<sub>3</sub>/Al<sub>2</sub>O<sub>3</sub> after TOS of 50 h; Raman profile of LaNiRuO<sub>3</sub> and LaNiRuO<sub>3</sub>/Al<sub>2</sub>O<sub>3</sub> after TOS of 50 h (c).

**Table S1** Metal content of LaNiRuO<sub>3</sub> and LaNiRuO<sub>3</sub>/Al<sub>2</sub>O<sub>3</sub>) determined by ICP-OES

| <b>Sample</b>                                          | <b>Metal</b> | <b>Nominal (%)</b> | <b>ICP-OES (%)</b> |
|--------------------------------------------------------|--------------|--------------------|--------------------|
| <b>LaNiRuO<sub>3</sub></b>                             | La           | 56.6               | 57.1               |
|                                                        | Ni           | 21.5               | 22.1               |
|                                                        | Ru           | 2.4                | 1.02               |
| <b>LaNiRuO<sub>3</sub>/Al<sub>2</sub>O<sub>3</sub></b> | La           | 17                 | 14.4               |
|                                                        | Ni           | 6.5                | 5.31               |
|                                                        | Ru           | 0.7                | 0.22               |
|                                                        | Al           | 37                 | 34.3               |
